# Supplementary material
Source: PubMed Central journal article supplement (PMC3486064)
Supplement: IAI.00764-12_zii999099875so1.pdf [file IAI.00764-12_zii999099875so1.pdf]

Figure S1: SSL4<sub>t</sub> and SSL4<sub>t</sub>-R182A Binding sLe<sup>x</sup>

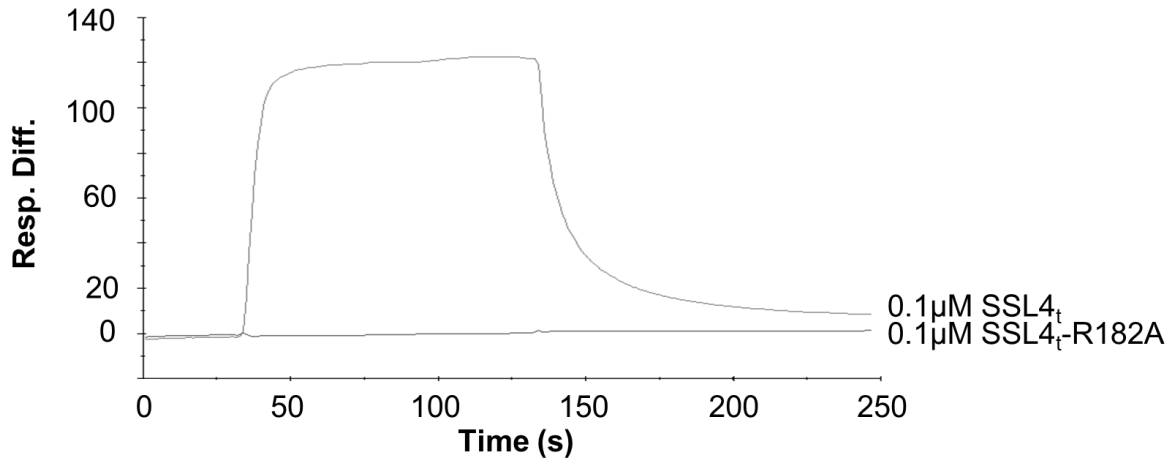

**FIGURE S1:** Sensorgram of 0.1  $\mu\text{M}$  SSL4<sub>t</sub> and SSL4<sub>t</sub>-R182A binding sLe<sup>x</sup>

**TABLE S1:** Quantitative measure of SSL4<sub>t</sub>, SSL4<sub>t</sub>-N181H, and SSL11 binding to sLe<sup>x</sup> and sLacNac. A steady state affinity binding model was used to calculate an affinity constant at equilibrium.

|                          | sLe <sup>x</sup>    |               |                  | sLacNac             |                |                  |
|--------------------------|---------------------|---------------|------------------|---------------------|----------------|------------------|
|                          | K <sub>D</sub> (nM) | Rmax          | Chi <sup>2</sup> | K <sub>D</sub> (nM) | Rmax           | Chi <sup>2</sup> |
| SSL4 <sub>t</sub>        | 86.96 ± 4.53        | 235.50 ± 0.14 | 6.95 ± 0.01      | 471.70 ± 18.67      | 374.00 ± 7.21  | 1.91 ± 1.22      |
| SSL4 <sub>t</sub> -N181H | 90.76 ± 6.36        | 243.25 ± 3.18 | 6.28 ± 0.33      | 119.05 ± 10.25      | 414.25 ± 0.49  | 6.78 ± 3.41      |
| SSL11                    | 2320 ± 200          | 217.95 ± 0.64 | 2.67 ± 1.96      | 2430 ± 180          | 478.00 ± 44.42 | 8.58 ± 9.16      |

**TABLE S2:** SSL4<sub>t</sub> binding to glycan array at 100 µg/mL

| Glycan number | Glycan name                                                                                         | Avg w/o Max & Min | StDev w/o Max & Min | SEM w/o Max & Min | %CV |
|---------------|-----------------------------------------------------------------------------------------------------|-------------------|---------------------|-------------------|-----|
| 233           | Neu5Aca2-3Galβ1-4(Fuca1-3)GlcNAcβ1-3Galβ1-4GlcNAcβ-Sp8                                              | 10246             | 1636                | 818               | 16  |
| 229           | Neu5Aca2-3Galβ1-4(Fuca1-3)GlcNAcβ1-3Galβ1-4(Fuca1-3)GlcNAcβ1-3Galβ1-4(Fuca1-3)GlcNAcβ-Sp0           | 7555              | 449                 | 224               | 6   |
| 231           | Neu5Aca2-3Galβ1-4(Fuca1-3)GlcNAcβ-Sp8                                                               | 6916              | 2675                | 1338              | 39  |
| 235           | Neu5Aca2-3Galβ1-4GlcNAcβ1-3Galβ1-4GlcNAcβ1-3Galβ1-4GlcNAcβ-Sp0                                      | 4871              | 967                 | 483               | 20  |
| 227           | Neu5Aca2-3Galβ1-4[6OSO3]GlcNAcβ-Sp8                                                                 | 4717              | 305                 | 152               | 6   |
| 232           | Neu5Aca2-3Galβ1-4(Fuca1-3)GlcNAcβ1-3Galβ-Sp8                                                        | 4496              | 405                 | 202               | 9   |
| 259           | Neu5Gca2-3Galβ1-4(Fuca1-3)GlcNAcβ-Sp0                                                               | 4444              | 900                 | 450               | 20  |
| 143           | Neu5Aca2-3Galβ1-4GlcNAcβ1-2Manα1-3(Neu5Aca2-3Galβ1-4GlcNAcβ1-2Manα1-6)Manβ1-4GlcNAcβ1-4GlcNAcβ-Sp12 | 4253              | 297                 | 148               | 7   |
| 237           | Neu5Aca2-3Galβ1-4GlcNAcβ-Sp8                                                                        | 3774              | 215                 | 108               | 6   |
| 293           | Galβ1-3(Neu5Aca2-3Galβ1-4(Fuca1-3)GlcNAcβ1-6)GalNAc-Sp14                                            | 3525              | 495                 | 247               | 14  |
| 285           | Neu5Aca2-3Galβ1-4GlcNAcβ1-3Galβ1-3GlcNAcβ-Sp0                                                       | 3150              | 81                  | 40                | 3   |
| 230           | Neu5Aca2-3Galβ1-4(Fuca1-3)GlcNAcβ-Sp0                                                               | 3118              | 162                 | 81                | 5   |
| 228           | Neu5Aca2-3Galβ1-4(Fuca1-3)(6OSO3)GlcNAcβ-Sp8                                                        | 3039              | 402                 | 201               | 13  |
| 315           | Neu5Aca2-3Galβ1-3(Neu5Aca2-3Galβ1-4GlcNAcβ1-6)GalNAc-Sp14                                           | 2946              | 303                 | 152               | 10  |
| 208           | Neu5Aca2-3(6-O-Su)Galβ1-4(Fuca1-3)GlcNAcβ-Sp8                                                       | 2844              | 352                 | 176               | 12  |
| 46            | NeuAca2-3[6OSO3]Galβ1-4GlcNAcβ-Sp8                                                                  | 2745              | 300                 | 150               | 11  |
| 277           | Galβ1-3-(Neu5Aa2-3Galβ1-4GlcNAcβ1-6)GalNAc-Sp14                                                     | 2736              | 797                 | 398               | 29  |
| 222           | Neu5Aca2-3Galβ-Sp8                                                                                  | 2327              | 172                 | 86                | 7   |
| 240           | Neu5Aca2-3Galβ1-4Glcβ-Sp8                                                                           | 1627              | 167                 | 84                | 10  |
| 238           | Neu5Aca2-3Galβ1-4GlcNAcβ1-3Galβ1-4GlcNAcβ-Sp0                                                       | 1565              | 72                  | 36                | 5   |
| 212           | NeuAca2-3(NeuAca2-3Galβ1-3GalNAcβ1-4)Galβ1-4Glcβ-Sp0                                                | 1491              | 142                 | 71                | 10  |
| 249           | Neu5Aca2-6Galβ1-4Glcβ-Sp0                                                                           | 1458              | 78                  | 39                | 5   |
| 220           | Neu5Aca2-3Galβ1-3[6OSO3]GalNAcα-Sp8                                                                 | 1352              | 102                 | 51                | 8   |
| 225           | Neu5Aca2-3Galβ1-3GlcNAcβ-Sp0                                                                        | 1300              | 76                  | 38                | 6   |
| 214           | Neu5Aca2-3GalNAcα-Sp8                                                                               | 1258              | 211                 | 106               | 17  |
| 210           | Neu5Aca2-3(GalNAcβ1-4)Galβ1-4GlcNAcβ-Sp8                                                            | 1229              | 117                 | 58                | 9   |
| 318           | Neu5Aca2-3Galβ1-4GlcNAcβ1-2Manα1-3(Neu5Aca2-6Galβ1-4GlcNAcβ1-2Manα1-6)Manβ1-4GlcNAcβ1-4GlcNAcβ-Sp12 | 1222              | 81                  | 40                | 7   |
| 199           | Neu5Aca2-6Galβ1-4GlcNAcβ1-2Manα1-3(Neu5Aca2-3Galβ1-4GlcNAcβ1-2Manα1-6)Manβ1-4GlcNAcβ1-4GlcNAcβ-Sp12 | 1173              | 58                  | 29                | 5   |
| 1             | Neu5Aca2-8Neu5Aca-Sp8                                                                               | 1121              | 256                 | 128               | 23  |
| 202           | Neu5Aca2-3Galβ1-3GalNAcα-Sp8                                                                        | 1113              | 52                  | 26                | 5   |
| 26            | [3OSO3][6OSO3]Galβ1-4[6OSO3]GlcNAcβ-Sp0                                                             | 1109              | 147                 | 73                | 13  |
| 224           | NeuAca2-3Galβ1-3GlcNAcβ1-3Galβ1-4GlcNAcβ-Sp0                                                        | 1098              | 221                 | 111               | 20  |
| 236           | Neu5Aca2-3Galβ1-4GlcNAcβ-Sp0                                                                        | 1090              | 136                 | 68                | 13  |
| 287           | [3OSO3][4OSO3]Galβ1-4GlcNAcβ-SpSp0                                                                  | 1079              | 180                 | 90                | 17  |
| 53            | Neu5Aca2-6Galβ1-4GlcNAcβ1-2Manα1-3(Neu5Aca2-6Galβ1-4GlcNAcβ1-2Manα1-6)Manβ1-4GlcNAcβ1-4GlcNAcβ-Sp13 | 1036              | 255                 | 128               | 25  |
| 295           | Galβ1-4GlcNAcβ1-2Manα1-3(Neu5Aca2-6Galβ1-                                                           | 1018              | 169                 | 84                | 17  |

|     |                                                                                                                                                                                           |     |     |     |    |
|-----|-------------------------------------------------------------------------------------------------------------------------------------------------------------------------------------------|-----|-----|-----|----|
|     | 4GlcNAc $\beta$ 1-2Man $\alpha$ 1-6)Man $\beta$ 1-4GlcNAc $\beta$ 1-4GlcNAc $\beta$ -Sp12                                                                                                 |     |     |     |    |
| 180 | Glc $\beta$ 1-4Glc $\beta$ -Sp8                                                                                                                                                           | 994 | 139 | 69  | 14 |
| 247 | Neu5Aca2-6Gal $\beta$ 1-4GlcNAc $\beta$ 1-3Gal $\beta$ 1-4(Fuca1-3)GlcNAc $\beta$ 1-3Gal $\beta$ 1-4(Fuca1-3)GlcNAc $\beta$ -Sp0                                                          | 985 | 99  | 50  | 10 |
| 219 | Neu5Aca2-3Gal $\beta$ 1-3(Neu5Aca2-3Gal $\beta$ 1-4)GlcNAc $\beta$ -Sp8                                                                                                                   | 971 | 148 | 74  | 15 |
| 261 | Neu5Gca2-3Gal $\beta$ 1-4Glc $\beta$ -Sp0                                                                                                                                                 | 965 | 225 | 113 | 23 |
| 267 | [3OSO3]Gal $\beta$ 1-4[Fuca1-3][6OSO3]GlcNAc-Sp8                                                                                                                                          | 960 | 80  | 40  | 8  |
| 216 | Neu5Aca2-3Gal $\beta$ 1-3(6OSO3)GlcNAc-Sp8                                                                                                                                                | 954 | 45  | 23  | 5  |
| 60  | Fuca1-2Gal $\beta$ 1-3GalNAc $\beta$ 1-4(Neu5Aca2-3)Gal $\beta$ 1-4Glc $\beta$ -Sp9                                                                                                       | 906 | 210 | 105 | 23 |
| 265 | [3OSO3]Gal $\beta$ 1-4(Fuca1-3)(6OSO3)Glc-Sp0                                                                                                                                             | 902 | 80  | 40  | 9  |
| 14  | $\alpha$ -Neu5Ac-Sp8                                                                                                                                                                      | 885 | 55  | 28  | 6  |
| 253 | Neu5Aca2-8Neu5Aca2-3Gal $\beta$ 1-4Glc $\beta$ -Sp0                                                                                                                                       | 864 | 84  | 42  | 10 |
| 188 | KDN $\alpha$ 2-3Gal $\beta$ 1-4GlcNAc $\beta$ -Sp0                                                                                                                                        | 849 | 147 | 74  | 17 |
| 40  | [4OSO3]Gal $\beta$ 1-4GlcNAc $\beta$ -Sp8                                                                                                                                                 | 844 | 225 | 112 | 27 |
| 73  | Fuca1-2Gal $\beta$ 1-4Glc $\beta$ -Sp0                                                                                                                                                    | 843 | 626 | 313 | 74 |
| 218 | NeuAca2-3Gal $\beta$ 1-3(Fuca1-4)GlcNAc $\beta$ 1-3Gal $\beta$ 1-4(Fuca1-3)GlcNAc $\beta$ Sp0                                                                                             | 791 | 246 | 123 | 31 |
| 251 | Neu5Aca2-6Gal $\beta$ -Sp8                                                                                                                                                                | 768 | 119 | 60  | 16 |
| 29  | [3OSO3]Gal $\beta$ 1-4(6OSO3)Glc $\beta$ -Sp0                                                                                                                                             | 757 | 127 | 63  | 17 |
| 194 | Man $\alpha$ 1-2Man $\alpha$ 1-2Man $\alpha$ 1-3(Man $\alpha$ 1-2Man $\alpha$ 1-3(Man $\alpha$ 1-2Man $\alpha$ 1-6)Man $\alpha$ 1-6)Man $\beta$ 1-4GlcNAc $\beta$ 1-4GlcNAc $\beta$ -Sp12 | 756 | 261 | 131 | 35 |
| 263 | Neu5Gca2-6Gal $\beta$ 1-4GlcNAc $\beta$ -Sp0                                                                                                                                              | 746 | 118 | 59  | 16 |
| 3   | Neu5Aca2-8Neu5Aca2-8Neu5Ac $\beta$ -Sp8                                                                                                                                                   | 713 | 40  | 20  | 6  |
| 38  | [3OSO3]Gal $\beta$ -Sp8                                                                                                                                                                   | 709 | 147 | 74  | 21 |
| 18  | $\beta$ -D-Glc-Sp8                                                                                                                                                                        | 688 | 141 | 70  | 20 |
| 34  | [3OSO3]Gal $\beta$ 1-4(Fuca1-3)GlcNAc $\beta$ -Sp8                                                                                                                                        | 677 | 230 | 115 | 34 |
| 257 | Neu5Gca2-3Gal $\beta$ 1-3(Fuca1-4)GlcNAc $\beta$ -Sp0                                                                                                                                     | 676 | 208 | 104 | 31 |
| 311 | Man $\alpha$ 1-6Man $\beta$ -Sp10                                                                                                                                                         | 663 | 159 | 80  | 24 |
| 319 | Neu5Aca2-6Gal $\beta$ 1-4GlcNAc $\beta$ 1-2Man $\alpha$ 1-3(Gal $\beta$ 1-4GlcNAc $\beta$ 1-2Man $\alpha$ 1-6)Man $\beta$ 1-4GlcNAc $\beta$ 1-4GlcNAc $\beta$ -Sp12                       | 655 | 362 | 181 | 55 |
| 70  | Fuca1-2Gal $\beta$ 1-4GlcNAc $\beta$ 1-3Gal $\beta$ 1-4GlcNAc $\beta$ 1-3Gal $\beta$ 1-4GlcNAc $\beta$ -Sp0                                                                               | 655 | 68  | 34  | 10 |
| 303 | GlcA $\beta$ 1-3GlcNAc $\beta$ -Sp8                                                                                                                                                       | 649 | 63  | 32  | 10 |
| 317 | Neu5Aca2-3Gal $\beta$ 1-3GalNAc-Sp14                                                                                                                                                      | 617 | 129 | 65  | 21 |
| 305 | GlcNAc $\beta$ 1-2Man $\alpha$ 1-3(GlcNAc $\beta$ 1-2Man $\alpha$ 1-6)Man $\beta$ 1-4GlcNAc $\beta$ 1-4GlcNAc $\beta$ -Sp12                                                               | 616 | 248 | 124 | 40 |
| 192 | Man $\alpha$ 1-6(Man $\alpha$ 1-2Man $\alpha$ 1-3)Man $\alpha$ 1-6(Man $\alpha$ 2Man $\alpha$ 1-3)Man $\beta$ 1-4GlcNAc $\beta$ 1-4GlcNAc $\beta$ -Sp12                                   | 603 | 103 | 51  | 17 |
| 270 | Fuca1-2Gal $\beta$ 1-4[6OSO3]GlcNAc-Sp8                                                                                                                                                   | 586 | 127 | 63  | 22 |
| 215 | Neu5Aca2-3GalNAc $\beta$ 1-4GlcNAc $\beta$ -Sp0                                                                                                                                           | 584 | 193 | 96  | 33 |
| 260 | Neu5Gca2-3Gal $\beta$ 1-4GlcNAc $\beta$ -Sp0                                                                                                                                              | 574 | 339 | 169 | 59 |
| 198 | Man $\alpha$ 1-6(Man $\alpha$ 1-3)Man $\alpha$ 1-6(Man $\alpha$ 1-3)Man $\beta$ 1-4GlcNAc $\beta$ 1-4GlcNAc $\beta$ -Sp12                                                                 | 569 | 106 | 53  | 19 |
| 256 | Gal $\beta$ 1-4GlcNAc $\beta$ 1-2Man $\alpha$ 1-3(Neu5Aca2-6Gal $\beta$ 1-4GlcNAc $\beta$ 1-2Man $\alpha$ 1-6)Man $\beta$ 1-4GlcNAc $\beta$ 1-4GlcNAc $\beta$ -Sp21                       | 567 | 168 | 84  | 30 |
| 291 | Gal $\alpha$ 1-3GalNAc $\alpha$ -Sp16                                                                                                                                                     | 553 | 84  | 42  | 15 |
| 186 | GlcA $\beta$ 1-6Gal $\beta$ -Sp8                                                                                                                                                          | 545 | 225 | 113 | 41 |
| 48  | 9NAcNeu5Aca-Sp8                                                                                                                                                                           | 538 | 73  | 37  | 14 |
| 16  | $\beta$ -Neu5Ac-Sp8                                                                                                                                                                       | 527 | 107 | 53  | 20 |
| 139 | Gal $\beta$ 1-4[6OSO3]Glc $\beta$ -Sp0                                                                                                                                                    | 527 | 107 | 54  | 20 |
| 136 | Gal $\beta$ 1-4(Fuca1-3)GlcNAc $\beta$ -Sp8                                                                                                                                               | 519 | 229 | 114 | 44 |
| 137 | Gal $\beta$ 1-4(Fuca1-3)GlcNAc $\beta$ 1-4Gal $\beta$ 1-4(Fuca1-3)GlcNAc $\beta$ -Sp0                                                                                                     | 519 | 64  | 32  | 12 |
| 239 | Neu5Aca2-3Gal $\beta$ 1-4Glc $\beta$ -Sp0                                                                                                                                                 | 517 | 97  | 48  | 19 |
| 168 | GlcNAc $\beta$ 1-4MDPLys                                                                                                                                                                  | 513 | 150 | 75  | 29 |
| 275 | Gal $\beta$ 1-3-(Gal $\beta$ 1-4GlcNAc $\beta$ 1-6)GalNAc-Sp14                                                                                                                            | 510 | 89  | 45  | 17 |

|     |                                                                                                   |     |     |     |    |
|-----|---------------------------------------------------------------------------------------------------|-----|-----|-----|----|
| 289 | 6-H2PO3Glcβ-Sp10                                                                                  | 504 | 163 | 81  | 32 |
| 170 | GlcNAcβ1-4Galβ1-4GlcNAcβ-Sp8                                                                      | 496 | 228 | 114 | 46 |
| 273 | Fuca1-2-Galβ1-4[6OSO3]Glc-Sp0                                                                     | 487 | 173 | 86  | 35 |
| 56  | Fuca1-2Galβ1-3GalNAcβ1-3Galα1-4Galβ1-4Glcβ-Sp9                                                    | 487 | 216 | 108 | 44 |
| 113 | Galα1-6Glcβ-Sp8                                                                                   | 482 | 51  | 26  | 11 |
| 47  | [6OSO3]GlcNAcβ-Sp8                                                                                | 480 | 146 | 73  | 30 |
| 204 | Neu5Aca2-8Neu5Aca2-8Neu5Aca2-3(GalNAcβ1-4)Galβ1-4Glcβ-Sp0                                         | 475 | 176 | 88  | 37 |
| 36  | [3OSO3]Galβ1-4GlcNAcβ-Sp0                                                                         | 473 | 66  | 33  | 14 |
| 184 | GlcAβ-Sp8                                                                                         | 472 | 118 | 59  | 25 |
| 133 | Galβ1-3GlcNAcβ-Sp0                                                                                | 471 | 77  | 39  | 16 |
| 245 | Neu5Aca2-6Galβ1-4GlcNAcβ-Sp0                                                                      | 465 | 248 | 124 | 53 |
| 281 | Galβ1-4[Fuca1-3][6OSO3]Glc-Sp0                                                                    | 460 | 90  | 45  | 20 |
| 243 | Neu5Aca2-6GalNAcβ1-4GlcNAcβ-Sp0                                                                   | 453 | 145 | 72  | 32 |
| 97  | Galα1-3(Fuca1-2)Galβ1-4GlcNAc-Sp0                                                                 | 441 | 184 | 92  | 42 |
| 309 | HOOC(CH3)CH-3-O-GlcNAcβ1-4GlcNAcβ-Sp10                                                            | 441 | 203 | 101 | 46 |
| 71  | Fuca1-2Galβ1-4GlcNAcβ-Sp0                                                                         | 438 | 171 | 86  | 39 |
| 87  | GalNAca1-4(Fuca1-2)Galβ1-4GlcNAcβ-Sp8                                                             | 429 | 32  | 16  | 7  |
| 162 | GlcNAcβ1-3Galβ-Sp8                                                                                | 418 | 118 | 59  | 28 |
| 115 | Galβ1-3(Fuca1-4)GlcNAcβ1-3Galβ1-4(Fuca1-3)GlcNAcβ-Sp0                                             | 418 | 108 | 54  | 26 |
| 299 | Galβ1-4GlcNAcβ1-6Galβ1-4GlcNAcβ-Sp0                                                               | 418 | 83  | 41  | 20 |
| 103 | Galα1-3Galβ1-4(Fuca1-3)GlcNAcβ-Sp8                                                                | 417 | 105 | 52  | 25 |
| 84  | GalNAca1-3(Fuca1-2)Galβ-Sp8                                                                       | 416 | 149 | 74  | 36 |
| 76  | Fuca1-3GlcNAcβ-Sp8                                                                                | 411 | 218 | 109 | 53 |
| 248 | Neu5Aca2-6Galβ1-4GlcNAcβ1-3Galβ1-4GlcNAcβ-Sp0                                                     | 409 | 103 | 51  | 25 |
| 58  | Fuca1-2Galβ1-3GalNAca-Sp8                                                                         | 407 | 118 | 59  | 29 |
| 123 | Galβ1-3(Neu5Acβ2-6)GalNAca-Sp8                                                                    | 402 | 66  | 33  | 16 |
| 154 | Galβ1-4Glcβ-Sp0                                                                                   | 400 | 143 | 71  | 36 |
| 172 | (GlcNAcβ1-4)5β-Sp8                                                                                | 399 | 152 | 76  | 38 |
| 201 | Fuca1-3(Galβ1-4)GlcNAcβ1-2Mana1-3(Fuca1-3(Galβ1-4)GlcNAcβ1-2Mana1-6)Manβ1-4GlcNAcβ1-4GlcNAcβ-Sp20 | 399 | 143 | 72  | 36 |
| 190 | Mana1-2Mana1-3(Mana1-2Mana1-6)Mana-Sp9                                                            | 394 | 84  | 42  | 21 |
| 35  | [3OSO3]Galβ1-4[6OSO3]GlcNAcβ-Sp8                                                                  | 392 | 66  | 33  | 17 |
| 106 | Galα1-3Galβ1-4Glcβ-Sp0                                                                            | 389 | 87  | 43  | 22 |
| 121 | Galβ1-3(GlcNAcβ1-6)GalNAca-Sp8                                                                    | 387 | 61  | 30  | 16 |
| 12  | α-L-Fuc-Sp9                                                                                       | 382 | 203 | 101 | 53 |
| 31  | [3OSO3]Galβ1-3(Fuca1-4)GlcNAcβ-Sp8                                                                | 381 | 153 | 77  | 40 |
| 105 | Galα1-3Galβ1-4GlcNAcβ-Sp8                                                                         | 377 | 179 | 89  | 48 |
| 52  | Galβ1-4GlcNAcβ1-2Mana1-3(Galβ1-4GlcNAcβ1-2Mana1-6)Manβ1-4GlcNAcβ1-4GlcNAcβ-Sp13                   | 376 | 150 | 75  | 40 |
| 99  | Galα1-3(Fuca1-2)Galβ-Sp8                                                                          | 374 | 65  | 33  | 17 |
| 109 | Galα1-4Galβ1-4GlcNAcβ-Sp0                                                                         | 368 | 54  | 27  | 15 |
| 127 | Galβ1-3GalNAcβ1-3Galα1-4Galβ1-4Glcβ-Sp0                                                           | 367 | 125 | 63  | 34 |
| 78  | Fucβ1-3GlcNAcβ-Sp8                                                                                | 367 | 81  | 41  | 22 |
| 108 | Galα1-4(Fuca1-2)Galβ1-4GlcNAcβ-Sp8                                                                | 359 | 115 | 57  | 32 |
| 64  | Fuca1-2Galβ1-3GlcNAcβ-Sp8                                                                         | 356 | 71  | 36  | 20 |
| 5   | Galβ1-3GlcNAcβ1-2Mana1-3(Galβ1-3GlcNAcβ1-2Mana1-6)Manβ1-4GlcNAcβ1-4GlcNAcβ-Sp19                   | 355 | 42  | 21  | 12 |
| 62  | Fuca1-2Galβ1-3GlcNAcβ1-3Galβ1-4Glcβ-Sp8                                                           | 352 | 104 | 52  | 30 |
| 153 | Galβ1-4GlcNAcβ-Sp8                                                                                | 348 | 60  | 30  | 17 |
| 151 | Galβ1-4GlcNAcβ1-6GalNAca-Sp8                                                                      | 348 | 69  | 34  | 20 |
| 21  | β-GlcNAc-Sp0                                                                                      | 346 | 110 | 55  | 32 |
| 111 | Galα1-4Galβ1-4Glcβ-Sp0                                                                            | 344 | 90  | 45  | 26 |

|     |                                                                                                                                                                       |     |     |     |    |
|-----|-----------------------------------------------------------------------------------------------------------------------------------------------------------------------|-----|-----|-----|----|
| 50  | Man $\alpha$ 1-3(Man $\alpha$ 1-6)Man $\beta$ 1-4GlcNAc $\beta$ 1-4GlcNAc $\beta$ -Sp13                                                                               | 344 | 246 | 123 | 71 |
| 85  | GalNAc $\alpha$ 1-3GalNAc $\beta$ -Sp8                                                                                                                                | 343 | 155 | 77  | 45 |
| 24  | (Gal $\beta$ 1-4GlcNAc $\beta$ )2-3,6-GalNAc $\alpha$ -Sp8                                                                                                            | 343 | 95  | 48  | 28 |
| 283 | Gal $\beta$ 1-4GlcNAc $\beta$ 1-3Gal $\beta$ 1-3GlcNAc $\beta$ -Sp0                                                                                                   | 341 | 83  | 42  | 24 |
| 37  | [3OSO3]Gal $\beta$ 1-4GlcNAc $\beta$ -Sp8                                                                                                                             | 338 | 29  | 14  | 9  |
| 91  | GalNAc $\beta$ 1-4(Fuca1-3)GlcNAc $\beta$ -Sp0                                                                                                                        | 335 | 112 | 56  | 33 |
| 81  | GalNAc $\alpha$ 1-3(Fuca1-2)Gal $\beta$ 1-4GlcNAc $\beta$ -Sp0                                                                                                        | 333 | 131 | 66  | 39 |
| 66  | Fuca1-2Gal $\beta$ 1-4(Fuca1-3)GlcNAc $\beta$ 1-3Gal $\beta$ 1-4(Fuca1-3)GlcNAc $\beta$ 1-3Gal $\beta$ 1-4(Fuca1-3)GlcNAc $\beta$ -Sp0                                | 333 | 71  | 35  | 21 |
| 44  | [6OSO3]Gal $\beta$ 1-4GlcNAc $\beta$ -Sp8                                                                                                                             | 332 | 180 | 90  | 54 |
| 176 | GlcNAc $\beta$ 1-6Gal $\beta$ 1-4GlcNAc $\beta$ -Sp8                                                                                                                  | 324 | 96  | 48  | 30 |
| 209 | Neu5Ac $\alpha$ 2-3(GalNAc $\beta$ 1-4)Gal $\beta$ 1-4GlcNAc $\beta$ -Sp0                                                                                             | 324 | 39  | 19  | 12 |
| 20  | $\beta$ -GalNAc $\alpha$ -Sp8                                                                                                                                         | 324 | 184 | 92  | 57 |
| 163 | GlcNAc $\beta$ 1-3Gal $\beta$ 1-3GalNAc $\alpha$ -Sp8                                                                                                                 | 321 | 187 | 93  | 58 |
| 156 | GlcNAc $\alpha$ 1-3Gal $\beta$ 1-4GlcNAc $\beta$ -Sp8                                                                                                                 | 319 | 35  | 17  | 11 |
| 144 | Gal $\beta$ 1-4GlcNAc $\beta$ 1-3GalNAc $\alpha$ -Sp8                                                                                                                 | 317 | 28  | 14  | 9  |
| 17  | $\beta$ -D-Gal $\alpha$ -Sp8                                                                                                                                          | 315 | 101 | 51  | 32 |
| 174 | GlcNAc $\beta$ 1-6(Gal $\beta$ 1-3)GalNAc $\alpha$ -Sp8                                                                                                               | 311 | 87  | 43  | 28 |
| 146 | Gal $\beta$ 1-4GlcNAc $\beta$ 1-3Gal $\beta$ 1-4GlcNAc $\beta$ 1-3Gal $\beta$ 1-4GlcNAc $\beta$ -Sp0                                                                  | 310 | 93  | 46  | 30 |
| 266 | [3OSO3]Gal $\beta$ 1-4(Fuca1-3)Glc-Sp0                                                                                                                                | 309 | 59  | 30  | 19 |
| 33  | [3OSO3]Gal $\beta$ 1-3GlcNAc $\beta$ -Sp8                                                                                                                             | 308 | 265 | 133 | 86 |
| 42  | [6OSO3]Gal $\beta$ 1-4Glc $\beta$ -Sp0                                                                                                                                | 308 | 61  | 31  | 20 |
| 164 | GlcNAc $\beta$ 1-3Gal $\beta$ 1-4GlcNAc $\beta$ -Sp0                                                                                                                  | 308 | 85  | 42  | 27 |
| 226 | Neu5Ac $\alpha$ 2-3Gal $\beta$ 1-3GlcNAc $\beta$ -Sp8                                                                                                                 | 307 | 87  | 43  | 28 |
| 242 | Neu5Ac $\alpha$ 2-6GalNAc $\alpha$ -Sp8                                                                                                                               | 305 | 35  | 18  | 11 |
| 140 | Gal $\beta$ 1-4[6OSO3]Glc $\beta$ -Sp8                                                                                                                                | 303 | 147 | 73  | 48 |
| 313 | Man $\alpha$ 1-2Man $\alpha$ 1-2Man $\alpha$ 1-3(Man $\alpha$ 1-2Man $\alpha$ 1-6(Man $\alpha$ 1-3)Man $\alpha$ 1-6)Man $\alpha$ -Sp9                                 | 302 | 48  | 24  | 16 |
| 223 | NeuAc $\alpha$ 2-3Gal $\beta$ 1-3GalNAc $\beta$ 1-3Gal $\alpha$ 1-4Gal $\beta$ 1-4Glc $\beta$ -Sp0                                                                    | 301 | 158 | 79  | 52 |
| 27  | [3OSO3][6OSO3]Gal $\beta$ 1-4GlcNAc $\beta$ -Sp0                                                                                                                      | 301 | 48  | 24  | 16 |
| 148 | Gal $\beta$ 1-4GlcNAc $\beta$ 1-3Gal $\beta$ 1-4Glc $\beta$ -Sp0                                                                                                      | 297 | 37  | 18  | 12 |
| 107 | Gal $\alpha$ 1-3Gal $\beta$ -Sp8                                                                                                                                      | 297 | 117 | 59  | 39 |
| 254 | Neu5Ac $\beta$ 2-6GalNAc $\alpha$ -Sp8                                                                                                                                | 297 | 73  | 37  | 25 |
| 2   | Neu5Ac $\alpha$ 2-8Neu5Ac $\beta$ -Sp17                                                                                                                               | 296 | 115 | 57  | 39 |
| 297 | Gal $\beta$ 1-4GlcNAc $\beta$ 1-3(GlcNAc $\beta$ 1-6)Gal $\beta$ 1-4GlcNAc-Sp0                                                                                        | 296 | 111 | 55  | 37 |
| 89  | GalNAc $\beta$ 1-3(Fuca1-2)Gal $\beta$ -Sp8                                                                                                                           | 293 | 95  | 47  | 32 |
| 75  | Fuca1-3GlcNAc $\beta$ -Sp8                                                                                                                                            | 290 | 120 | 60  | 41 |
| 22  | $\beta$ -GlcNAc $\alpha$ -Sp8                                                                                                                                         | 289 | 136 | 68  | 47 |
| 94  | Gal $\alpha$ 1-2Gal $\beta$ -Sp8                                                                                                                                      | 287 | 187 | 93  | 65 |
| 25  | GlcNAc $\beta$ 1-3(GlcNAc $\beta$ 1-4)(GlcNAc $\beta$ 1-6)GlcNAc-Sp8                                                                                                  | 286 | 208 | 104 | 73 |
| 187 | KDN $\alpha$ 2-3Gal $\beta$ 1-3GlcNAc $\beta$ -Sp0                                                                                                                    | 284 | 46  | 23  | 16 |
| 290 | Gal $\alpha$ 1-3(Fuca1-2)Gal $\beta$ -Sp18                                                                                                                            | 284 | 98  | 49  | 35 |
| 185 | GlcA $\beta$ 1-3Gal $\beta$ -Sp8                                                                                                                                      | 281 | 123 | 62  | 44 |
| 102 | Gal $\alpha$ 1-3GalNAc $\beta$ -Sp8                                                                                                                                   | 281 | 137 | 68  | 49 |
| 193 | Man $\alpha$ 1-2Man $\alpha$ 1-6(Man $\alpha$ 1-3)Man $\alpha$ 1-6(Man $\alpha$ 2Man $\alpha$ 2Man $\alpha$ 1-3)Man $\beta$ 1-4GlcNAc $\beta$ 1-4GlcNAc $\beta$ -Sp12 | 280 | 99  | 49  | 35 |
| 80  | GalNAc $\alpha$ 1-3(Fuca1-2)Gal $\beta$ 1-4(Fuca1-3)GlcNAc $\beta$ -Sp0                                                                                               | 279 | 44  | 22  | 16 |
| 158 | GlcNAc $\beta$ 1-2Gal $\beta$ 1-3GalNAc $\alpha$ -Sp8                                                                                                                 | 279 | 85  | 43  | 31 |
| 181 | Glc $\beta$ 1-6Glc $\beta$ -Sp8                                                                                                                                       | 277 | 93  | 47  | 34 |
| 301 | GalNAc $\alpha$ 1-3(Fuca1-2)Gal $\beta$ -Sp18                                                                                                                         | 277 | 49  | 25  | 18 |
| 252 | Neu5Ac $\alpha$ 2-8Neu5Ac $\alpha$ -Sp8                                                                                                                               | 277 | 42  | 21  | 15 |
| 206 | Neu5Ac $\alpha$ 2-8Neu5Ac $\alpha$ 2-3(GalNAc $\beta$ 1-4)Gal $\beta$ 1-4Glc $\beta$ -Sp0                                                                             | 276 | 125 | 63  | 45 |

|     |                                                                                                                                                                                                 |     |     |    |    |
|-----|-------------------------------------------------------------------------------------------------------------------------------------------------------------------------------------------------|-----|-----|----|----|
| 8   | $\alpha$ -D-Glc-Sp8                                                                                                                                                                             | 272 | 115 | 57 | 42 |
| 271 | Fuca1-2[6OSO3]Gal $\beta$ 1-4[6OSO3]Glc-Sp0                                                                                                                                                     | 272 | 105 | 53 | 39 |
| 83  | GalNAc $\alpha$ 1-3(Fuca1-2)Gal $\beta$ 1-4Glc $\beta$ -Sp0                                                                                                                                     | 271 | 62  | 31 | 23 |
| 221 | Neu5Ac $\alpha$ 2-3Gal $\beta$ 1-3(Neu5Ac $\alpha$ 2-6)GalNAc $\alpha$ -Sp8                                                                                                                     | 270 | 101 | 51 | 37 |
| 138 | Gal $\beta$ 1-4(Fuca1-3)GlcNAc $\beta$ 1-4Gal $\beta$ 1-4(Fuca1-3)GlcNAc $\beta$ 1-4Gal $\beta$ 1-4(Fuca1-3)GlcNAc $\beta$ -Sp0                                                                 | 270 | 68  | 34 | 25 |
| 112 | Gal $\alpha$ 1-4GlcNAc $\beta$ -Sp8                                                                                                                                                             | 269 | 101 | 50 | 37 |
| 126 | Gal $\beta$ 1-3GalNAc $\beta$ -Sp8                                                                                                                                                              | 269 | 144 | 72 | 54 |
| 134 | Gal $\beta$ 1-3GlcNAc $\beta$ -Sp8                                                                                                                                                              | 267 | 92  | 46 | 34 |
| 269 | Fuca1-2[6OSO3]Gal $\beta$ 1-4GlcNAc-Sp0                                                                                                                                                         | 267 | 72  | 36 | 27 |
| 90  | GalNAc $\beta$ 1-3Gal $\alpha$ 1-4Gal $\beta$ 1-4GlcNAc $\beta$ -Sp0                                                                                                                            | 266 | 74  | 37 | 28 |
| 135 | Gal $\beta$ 1-4(Fuca1-3)GlcNAc $\beta$ -Sp0                                                                                                                                                     | 265 | 123 | 62 | 47 |
| 6   | Neu5Ac $\alpha$ 2-6Gal $\beta$ 1-4GlcNAc $\beta$ 1-2Man $\alpha$ 1-3(Neu5Ac $\alpha$ 2-6Gal $\beta$ 1-4GlcNAc $\beta$ 1-2Man $\alpha$ 1-6)Man $\beta$ 1-4GlcNAc $\beta$ 1-4GlcNAc $\beta$ -Sp12 | 262 | 32  | 16 | 12 |
| 74  | Fuca1-2Gal $\beta$ -Sp8                                                                                                                                                                         | 259 | 68  | 34 | 26 |
| 274 | Gal $\beta$ 1-3(Fuca1-4)GlcNAc $\beta$ 1-3Gal $\beta$ 1-3(Fuca1-4)GlcNAc $\beta$ -Sp0                                                                                                           | 258 | 81  | 41 | 32 |
| 145 | Gal $\beta$ 1-4GlcNAc $\beta$ 1-3Gal $\beta$ 1-4(Fuca1-3)GlcNAc $\beta$ 1-3Gal $\beta$ 1-4(Fuca1-3)GlcNAc $\beta$ -Sp0                                                                          | 258 | 56  | 28 | 22 |
| 178 | Glc $\alpha$ 1-4Glc $\alpha$ -Sp8                                                                                                                                                               | 255 | 82  | 41 | 32 |
| 159 | GlcNAc $\beta$ 1-3(GlcNAc $\beta$ 1-6)GalNAc $\alpha$ -Sp8                                                                                                                                      | 255 | 65  | 32 | 25 |
| 175 | GlcNAc $\beta$ 1-6GalNAc $\alpha$ -Sp8                                                                                                                                                          | 254 | 133 | 66 | 52 |
| 160 | GlcNAc $\beta$ 1-3(GlcNAc $\beta$ 1-6)Gal $\beta$ 1-4GlcNAc $\beta$ -Sp8                                                                                                                        | 253 | 124 | 62 | 49 |
| 203 | NeuAc $\alpha$ 2-8NeuAc $\alpha$ 2-8NeuAc $\alpha$ 2-8NeuAc $\alpha$ 2-3(GalNAc $\beta$ 1-4)Gal $\beta$ 1-4Glc $\beta$ -Sp0                                                                     | 252 | 61  | 31 | 24 |
| 262 | Neu5Gc $\alpha$ 2-6GalNAc $\alpha$ -Sp0                                                                                                                                                         | 252 | 21  | 11 | 8  |
| 117 | Gal $\beta$ 1-3(Fuca1-4)GlcNAc-Sp0                                                                                                                                                              | 252 | 87  | 43 | 34 |
| 49  | 9NAcNeu5Ac $\alpha$ 2-6Gal $\beta$ 1-4GlcNAc $\beta$ -Sp8                                                                                                                                       | 250 | 62  | 31 | 25 |
| 63  | Fuca1-2Gal $\beta$ 1-3GlcNAc $\beta$ -Sp0                                                                                                                                                       | 248 | 73  | 37 | 30 |
| 39  | [4OSO3][6OSO3]Gal $\beta$ 1-4GlcNAc $\beta$ -Sp0                                                                                                                                                | 247 | 108 | 54 | 44 |
| 9   | $\alpha$ -D-Man-Sp8                                                                                                                                                                             | 247 | 106 | 53 | 43 |
| 182 | G-ol-Sp8                                                                                                                                                                                        | 247 | 112 | 56 | 46 |
| 197 | Man $\alpha$ 1-6(Man $\alpha$ 1-3)Man $\alpha$ 1-6(Man $\alpha$ 2Man $\alpha$ 1-3)Man $\beta$ 1-4GlcNAc $\beta$ 1-4GlcNAc $\beta$ -Sp12                                                         | 246 | 98  | 49 | 40 |
| 157 | GlcNAc $\alpha$ 1-6Gal $\beta$ 1-4GlcNAc $\beta$ -Sp8                                                                                                                                           | 244 | 126 | 63 | 52 |
| 93  | GalNAc $\beta$ 1-4GlcNAc $\beta$ -Sp8                                                                                                                                                           | 244 | 59  | 30 | 24 |
| 296 | Gal $\beta$ 1-4GlcNAc $\beta$ 1-3(Gal $\beta$ 1-4GlcNAc $\beta$ 1-6)Gal $\beta$ 1-4GlcNAc-Sp0                                                                                                   | 242 | 184 | 92 | 76 |
| 155 | Gal $\beta$ 1-4Glc $\beta$ -Sp8                                                                                                                                                                 | 242 | 120 | 60 | 50 |
| 244 | Neu5Ac $\alpha$ 2-6Gal $\beta$ 1-4[6OSO3]GlcNAc $\beta$ -Sp8                                                                                                                                    | 241 | 165 | 83 | 69 |
| 51  | GlcNAc $\beta$ 1-2Man $\alpha$ 1-3(GlcNAc $\beta$ 1-2Man $\alpha$ 1-6)Man $\beta$ 1-4GlcNAc $\beta$ 1-4GlcNAc $\beta$ -Sp13                                                                     | 240 | 63  | 32 | 26 |
| 288 | [6OSO3]Gal $\beta$ 1-4[6OSO3]GlcNAc $\beta$ -Sp0                                                                                                                                                | 239 | 128 | 64 | 53 |
| 166 | GlcNAc $\beta$ 1-3Gal $\beta$ 1-4GlcNAc $\beta$ 1-3Gal $\beta$ 1-4GlcNAc $\beta$ -Sp0                                                                                                           | 238 | 32  | 16 | 14 |
| 310 | Man $\alpha$ 1-3(Man $\alpha$ 1-6)Man $\beta$ 1-4GlcNAc $\beta$ 1-4GlcNAc $\beta$ -Sp12                                                                                                         | 238 | 94  | 47 | 39 |
| 258 | Neu5Gc $\alpha$ 2-3Gal $\beta$ 1-3GlcNAc $\beta$ -Sp0                                                                                                                                           | 237 | 147 | 73 | 62 |
| 125 | Gal $\beta$ 1-3GalNAc $\alpha$ -Sp8                                                                                                                                                             | 235 | 21  | 11 | 9  |
| 279 | Gal $\beta$ 1-3GlcNAc $\beta$ 1-3Gal $\beta$ 1-3GlcNAc $\beta$ -Sp0                                                                                                                             | 234 | 137 | 69 | 59 |
| 124 | Gal $\beta$ 1-3(Neu5Ac $\alpha$ 2-6)GlcNAc $\beta$ 1-4Gal $\beta$ 1-4Glc $\beta$ -Sp10                                                                                                          | 234 | 105 | 53 | 45 |
| 147 | Gal $\beta$ 1-4GlcNAc $\beta$ 1-3Gal $\beta$ 1-4GlcNAc $\beta$ -Sp0                                                                                                                             | 234 | 141 | 71 | 60 |
| 101 | Gal $\alpha$ 1-3GalNAc $\alpha$ -Sp8                                                                                                                                                            | 233 | 57  | 28 | 24 |
| 82  | GalNAc $\alpha$ 1-3(Fuca1-2)Gal $\beta$ 1-4GlcNAc $\beta$ -Sp8                                                                                                                                  | 233 | 90  | 45 | 39 |
| 264 | Neu5Gc $\alpha$ -Sp8                                                                                                                                                                            | 232 | 101 | 50 | 43 |
| 72  | Fuca1-2Gal $\beta$ 1-4GlcNAc $\beta$ -Sp8                                                                                                                                                       | 232 | 112 | 56 | 48 |

|     |                                                                                                                                                                                                |     |     |    |    |
|-----|------------------------------------------------------------------------------------------------------------------------------------------------------------------------------------------------|-----|-----|----|----|
| 217 | Neu5Ac $\alpha$ 2-3Gal $\beta$ 1-3(Fuca $\alpha$ 1-4)GlcNAc $\beta$ -Sp8                                                                                                                       | 230 | 70  | 35 | 31 |
| 150 | Gal $\beta$ 1-4GlcNAc $\beta$ 1-6(Gal $\beta$ 1-3)GalNAc $\alpha$ -Sp8                                                                                                                         | 230 | 52  | 26 | 22 |
| 152 | Gal $\beta$ 1-4GlcNAc $\beta$ -Sp0                                                                                                                                                             | 228 | 97  | 49 | 43 |
| 43  | [6OSO3]Gal $\beta$ 1-4Glc $\beta$ -Sp8                                                                                                                                                         | 227 | 32  | 16 | 14 |
| 302 | GalNAc $\beta$ 1-3Gal $\beta$ -Sp8                                                                                                                                                             | 227 | 94  | 47 | 41 |
| 142 | Gal $\beta$ 1-4GalNAc $\beta$ 1-3(Fuca $\alpha$ 1-2)Gal $\beta$ 1-4GlcNAc $\beta$ -Sp8                                                                                                         | 225 | 85  | 42 | 38 |
| 54  | Neu5Ac $\alpha$ 2-6Gal $\beta$ 1-4GlcNAc $\beta$ 1-2Man $\alpha$ 1-3(Neu5Ac $\alpha$ 2-6Gal $\beta$ 1-4GlcNAc $\beta$ 1-2Man $\alpha$ 1-6)Man $\beta$ 1-4GlcNAc $\beta$ 1-4GlcNAc $\beta$ -Sp8 | 225 | 81  | 41 | 36 |
| 68  | Fuca $\alpha$ 1-2Gal $\beta$ 1-4(Fuca $\alpha$ 1-3)GlcNAc $\beta$ -Sp8                                                                                                                         | 225 | 129 | 64 | 57 |
| 15  | $\alpha$ -Neu5Ac-Sp11                                                                                                                                                                          | 224 | 97  | 49 | 43 |
| 110 | Gal $\alpha$ 1-4Gal $\beta$ 1-4GlcNAc $\beta$ -Sp8                                                                                                                                             | 222 | 76  | 38 | 34 |
| 30  | [3OSO3]Gal $\beta$ 1-4(6OSO3)Glc $\beta$ -Sp8                                                                                                                                                  | 222 | 119 | 59 | 54 |
| 11  | $\alpha$ -L-Fuc-Sp8                                                                                                                                                                            | 222 | 49  | 24 | 22 |
| 79  | GalNAc $\alpha$ 1-3(Fuca $\alpha$ 1-2)Gal $\beta$ 1-3GlcNAc $\beta$ -Sp0                                                                                                                       | 221 | 77  | 39 | 35 |
| 165 | GlcNAc $\beta$ 1-3Gal $\beta$ 1-4GlcNAc $\beta$ -Sp8                                                                                                                                           | 220 | 122 | 61 | 56 |
| 161 | GlcNAc $\beta$ 1-3GalNAc $\alpha$ -Sp8                                                                                                                                                         | 218 | 191 | 96 | 88 |
| 120 | Gal $\beta$ 1-3(Gal $\beta$ 1-4GlcNAc $\beta$ 1-6)GalNAc $\alpha$ -Sp8                                                                                                                         | 218 | 99  | 50 | 45 |
| 61  | Fuca $\alpha$ 1-2Gal $\beta$ 1-3GlcNAc $\beta$ 1-3Gal $\beta$ 1-4Glc $\beta$ -Sp10                                                                                                             | 218 | 23  | 11 | 11 |
| 67  | Fuca $\alpha$ 1-2Gal $\beta$ 1-4(Fuca $\alpha$ 1-3)GlcNAc $\beta$ -Sp0                                                                                                                         | 217 | 76  | 38 | 35 |
| 320 | Neu5Ac $\alpha$ 2-6Gal $\beta$ 1-4GlcNAc $\beta$ 1-2Man $\alpha$ 1-3(GlcNAc $\beta$ 1-2Man $\alpha$ 1-6)Man $\beta$ 1-4GlcNAc $\beta$ 1-4GlcNAc $\beta$ -Sp12                                  | 216 | 111 | 55 | 51 |
| 96  | Gal $\alpha$ 1-3(Fuca $\alpha$ 1-2)Gal $\beta$ 1-4(Fuca $\alpha$ 1-3)GlcNAc $\beta$ -Sp0                                                                                                       | 215 | 59  | 30 | 28 |
| 45  | [6OSO3]Gal $\beta$ 1-4[6OSO3]Glc $\beta$ -Sp8                                                                                                                                                  | 213 | 63  | 31 | 29 |
| 195 | Man $\alpha$ 1-3(Man $\alpha$ 1-6)Man $\alpha$ -Sp9                                                                                                                                            | 212 | 69  | 35 | 33 |
| 292 | Gal $\beta$ 1-3GalNAc $\alpha$ -Sp16                                                                                                                                                           | 211 | 58  | 29 | 28 |
| 57  | Fuca $\alpha$ 1-2Gal $\beta$ 1-3(Fuca $\alpha$ 1-4)GlcNAc $\beta$ -Sp8                                                                                                                         | 211 | 93  | 47 | 44 |
| 131 | Gal $\beta$ 1-3GlcNAc $\beta$ 1-3Gal $\beta$ 1-4GlcNAc $\beta$ -Sp0                                                                                                                            | 210 | 138 | 69 | 65 |
| 114 | Gal $\beta$ 1-2Gal $\beta$ -Sp8                                                                                                                                                                | 210 | 55  | 28 | 26 |
| 246 | Neu5Ac $\alpha$ 2-6Gal $\beta$ 1-4GlcNAc $\beta$ -Sp8                                                                                                                                          | 210 | 46  | 23 | 22 |
| 280 | Gal $\beta$ 1-4[Fuca $\alpha$ 1-3][6OSO3]GlcNAc-Sp0                                                                                                                                            | 209 | 50  | 25 | 24 |
| 28  | [3OSO3]Gal $\beta$ 1-4Glc $\beta$ -Sp8                                                                                                                                                         | 208 | 118 | 59 | 57 |
| 173 | GlcNAc $\beta$ 1-4GlcNAc $\beta$ 1-4GlcNAc $\beta$ -Sp8                                                                                                                                        | 208 | 103 | 52 | 50 |
| 32  | [3OSO3]Gal $\beta$ 1-3GalNAc $\alpha$ -Sp8                                                                                                                                                     | 207 | 63  | 32 | 31 |
| 196 | Man $\alpha$ 1-3(Man $\alpha$ 1-2Man $\alpha$ 1-2Man $\alpha$ 1-6)Man $\alpha$ -Sp9                                                                                                            | 205 | 73  | 37 | 36 |
| 141 | Gal $\beta$ 1-4GalNAc $\alpha$ 1-3(Fuca $\alpha$ 1-2)Gal $\beta$ 1-4GlcNAc $\beta$ -Sp8                                                                                                        | 202 | 102 | 51 | 50 |
| 268 | [3OSO3]Gal $\beta$ 1-4[Fuca $\alpha$ 1-3]GlcNAc-Sp0                                                                                                                                            | 201 | 149 | 74 | 74 |
| 10  | $\alpha$ -GalNAc-Sp8                                                                                                                                                                           | 200 | 98  | 49 | 49 |
| 100 | Gal $\alpha$ 1-3(Gal $\alpha$ 1-4)Gal $\beta$ 1-4GlcNAc $\beta$ -Sp8                                                                                                                           | 198 | 77  | 38 | 39 |
| 205 | Neu5Ac $\alpha$ 2-8Neu5Ac $\alpha$ 2-8Neu5Ac $\alpha$ 2-3Gal $\beta$ 1-4Glc $\beta$ -Sp0                                                                                                       | 195 | 110 | 55 | 56 |
| 191 | Man $\alpha$ 1-2Man $\alpha$ 1-3Man $\alpha$ -Sp9                                                                                                                                              | 194 | 44  | 22 | 23 |
| 122 | Gal $\beta$ 1-3(Neu5Ac $\alpha$ 2-6)GalNAc $\alpha$ -Sp8                                                                                                                                       | 194 | 87  | 43 | 45 |
| 167 | GlcNAc $\beta$ 1-3Gal $\beta$ 1-4Glc $\beta$ -Sp0                                                                                                                                              | 193 | 43  | 22 | 22 |
| 128 | Gal $\beta$ 1-3GalNAc $\beta$ 1-4(Neu5Ac $\alpha$ 2-3)Gal $\beta$ 1-4Glc $\beta$ -Sp0                                                                                                          | 191 | 113 | 57 | 59 |
| 316 | Neu5Ac $\alpha$ 2-3Gal $\beta$ 1-3(Neu5Ac $\alpha$ 2-6)GalNAc-Sp14                                                                                                                             | 190 | 32  | 16 | 17 |
| 286 | [3OSO3]Gal $\beta$ 1-4[6OSO3]GlcNAc $\beta$ -Sp0                                                                                                                                               | 188 | 70  | 35 | 37 |
| 207 | Neu5Ac $\alpha$ 2-8Neu5Ac $\alpha$ 2-8Neu5Ac $\alpha$ -Sp8                                                                                                                                     | 188 | 84  | 42 | 45 |
| 88  | GalNAc $\beta$ 1-3GalNAc $\alpha$ -Sp8                                                                                                                                                         | 185 | 81  | 40 | 44 |
| 298 | Gal $\beta$ 1-4GlcNAc $\alpha$ 1-6Gal $\beta$ 1-4GlcNAc $\beta$ -Sp0                                                                                                                           | 185 | 47  | 23 | 25 |
| 149 | Gal $\beta$ 1-4GlcNAc $\beta$ 1-3Gal $\beta$ 1-4Glc $\beta$ -Sp8                                                                                                                               | 184 | 74  | 37 | 40 |
| 306 | GlcNAc $\beta$ 1-3Man-Sp10                                                                                                                                                                     | 183 | 93  | 47 | 51 |
| 23  | $\beta$ -GlcN(Gc)-Sp8                                                                                                                                                                          | 182 | 62  | 31 | 34 |

|     |                                                                                          |     |     |    |     |
|-----|------------------------------------------------------------------------------------------|-----|-----|----|-----|
| 272 | Fuca1-2-(6OSO3)-Galβ1-4Glc-Sp0                                                           | 181 | 103 | 52 | 57  |
| 86  | GalNAcα1-3Galβ-Sp8                                                                       | 181 | 108 | 54 | 60  |
| 77  | Fuca1-4GlcNAcβ-Sp8                                                                       | 181 | 185 | 92 | 102 |
| 211 | Neu5Acα2-3(GalNAcβ1-4)Galβ1-4Glcβ-Sp0                                                    | 179 | 112 | 56 | 63  |
| 284 | Neu5Acα2-3Galβ1-3GlcNAcβ1-3Galβ1-3GlcNAcβ-Sp0                                            | 178 | 53  | 26 | 30  |
| 179 | Glcα1-6Glcα1-6Glcβ-Sp8                                                                   | 176 | 54  | 27 | 31  |
| 4   | Neu5Gcβ2-6Galβ1-4GlcNAc-Sp8                                                              | 175 | 63  | 31 | 36  |
| 308 | GlcNAcβ1-4GlcNAcβ-Sp12                                                                   | 175 | 83  | 41 | 47  |
| 169 | GlcNAcβ1-4(GlcNAcβ1-6)GalNAcα-Sp8                                                        | 174 | 138 | 69 | 79  |
| 95  | Galα1-3(Fuca1-2)Galβ1-3GlcNAcβ-Sp0                                                       | 173 | 75  | 38 | 44  |
| 55  | Fuca1-2Galβ1-3GalNAcβ1-3Galα-Sp9                                                         | 172 | 31  | 15 | 18  |
| 7   | α-D-Gal-Sp8                                                                              | 172 | 86  | 43 | 50  |
| 307 | GlcNAcβ1-4GlcNAcβ-Sp10                                                                   | 172 | 101 | 50 | 59  |
| 92  | GalNAcβ1-4GlcNAcβ-Sp0                                                                    | 172 | 59  | 29 | 34  |
| 304 | GlcNAcβ1-2Manα1-3(Neu5Acα2-6Galβ1-4GlcNAcβ1-2Manα1-6)Manβ1-4GlcNAcβ1-4GlcNAcβ-Sp12       | 170 | 82  | 41 | 48  |
| 65  | Fuca1-2Galβ1-4(Fuca1-3)GlcNAcβ1-3Galβ1-4(Fuca1-3)GlcNAcβ-Sp0                             | 166 | 39  | 20 | 24  |
| 177 | Glcα1-4Glcβ-Sp8                                                                          | 165 | 64  | 32 | 39  |
| 98  | Galα1-3(Fuca1-2)Galβ1-4Glcβ-Sp0                                                          | 159 | 87  | 43 | 54  |
| 189 | Manα1-2Manα1-2Manα1-3Manα-Sp9                                                            | 158 | 84  | 42 | 54  |
| 276 | Galβ1-3(GlcNAcβ1-6)GalNAc-Sp14                                                           | 155 | 87  | 44 | 56  |
| 234 | Neu5Acα2-3Galβ1-4GlcNAcβ1-3Galβ1-4(Fuca1-3)GlcNAc-Sp0                                    | 154 | 26  | 13 | 17  |
| 132 | Galβ1-3GlcNAcβ1-3Galβ1-4Glcβ-Sp10                                                        | 153 | 92  | 46 | 60  |
| 183 | GlcAa-Sp8                                                                                | 153 | 106 | 53 | 70  |
| 129 | Galβ1-3GalNAcβ1-4Galβ1-4Glcβ-Sp8                                                         | 151 | 56  | 28 | 37  |
| 59  | Fuca1-2Galβ1-3GalNAcβ1-4(Neu5Acα2-3)Galβ1-4Glcβ-Sp0                                      | 150 | 32  | 16 | 21  |
| 282 | Galβ1-4(Fuca1-3)GlcNAcβ1-3Galβ1-3(Fuca1-4)GlcNAcβ-Sp0                                    | 150 | 108 | 54 | 72  |
| 69  | Fuca1-2Galβ1-4GlcNAcβ1-3Galβ1-4GlcNAc-Sp0                                                | 145 | 44  | 22 | 30  |
| 118 | Galβ1-3(Fuca1-4)GlcNAc-Sp8                                                               | 140 | 50  | 25 | 36  |
| 250 | Neu5Acα2-6Galβ1-4Glcβ-Sp8                                                                | 139 | 51  | 25 | 36  |
| 41  | 6-H2PO3Manα-Sp8                                                                          | 139 | 53  | 26 | 38  |
| 13  | α-L-Rha-Sp8                                                                              | 136 | 34  | 17 | 25  |
| 130 | Galβ1-3Galβ-Sp8                                                                          | 131 | 98  | 49 | 75  |
| 116 | Galβ1-3(Fuca1-4)GlcNAcβ1-3Galβ1-4GlcNAcβ-Sp0                                             | 130 | 107 | 54 | 82  |
| 312 | Manα1-6(Manα1-3)Manα1-6(Manα1-3)Manβ-Sp10                                                | 128 | 78  | 39 | 61  |
| 255 | Neu5Acβ2-6Galβ1-4GlcNAcβ-Sp8                                                             | 128 | 46  | 23 | 36  |
| 200 | Manβ1-4GlcNAcβ-Sp0                                                                       | 115 | 73  | 37 | 64  |
| 278 | Galβ1-3GalNAc-Sp14                                                                       | 115 | 47  | 24 | 41  |
| 171 | (GlcNAcβ1-4)6β-Sp8                                                                       | 114 | 24  | 12 | 21  |
| 314 | Manα1-2Manα1-2Manα1-3(Manα1-2Manα1-6(Manα1-2Manα1-3)Manα1-6)Manα-Sp9                     | 109 | 43  | 22 | 40  |
| 213 | Neu5Acα2-3(Neu5Acα2-6)GalNAcα-Sp8                                                        | 109 | 47  | 24 | 43  |
| 104 | Galα1-3Galβ1-3GlcNAcβ-Sp0                                                                | 103 | 38  | 19 | 37  |
| 119 | Galβ1-3(Fuca1-4)GlcNAcβ-Sp8                                                              | 103 | 36  | 18 | 35  |
| 294 | Galβ1-3Galβ1-4GlcNAcβ-Sp8                                                                | 98  | 29  | 14 | 30  |
| 241 | Galβ1-4GlcNAcβ1-2Manα1-3(Fuca1-3(Galβ1-4)GlcNAcβ1-2Manα1-6)Manβ1-4GlcNAcβ1-4GlcNAcβ-Sp20 | 97  | 38  | 19 | 39  |
| 300 | GalNAcα-Sp15                                                                             | 96  | 24  | 12 | 25  |
| 19  | β-D-Man-Sp8                                                                              | 83  | 19  | 10 | 23  |



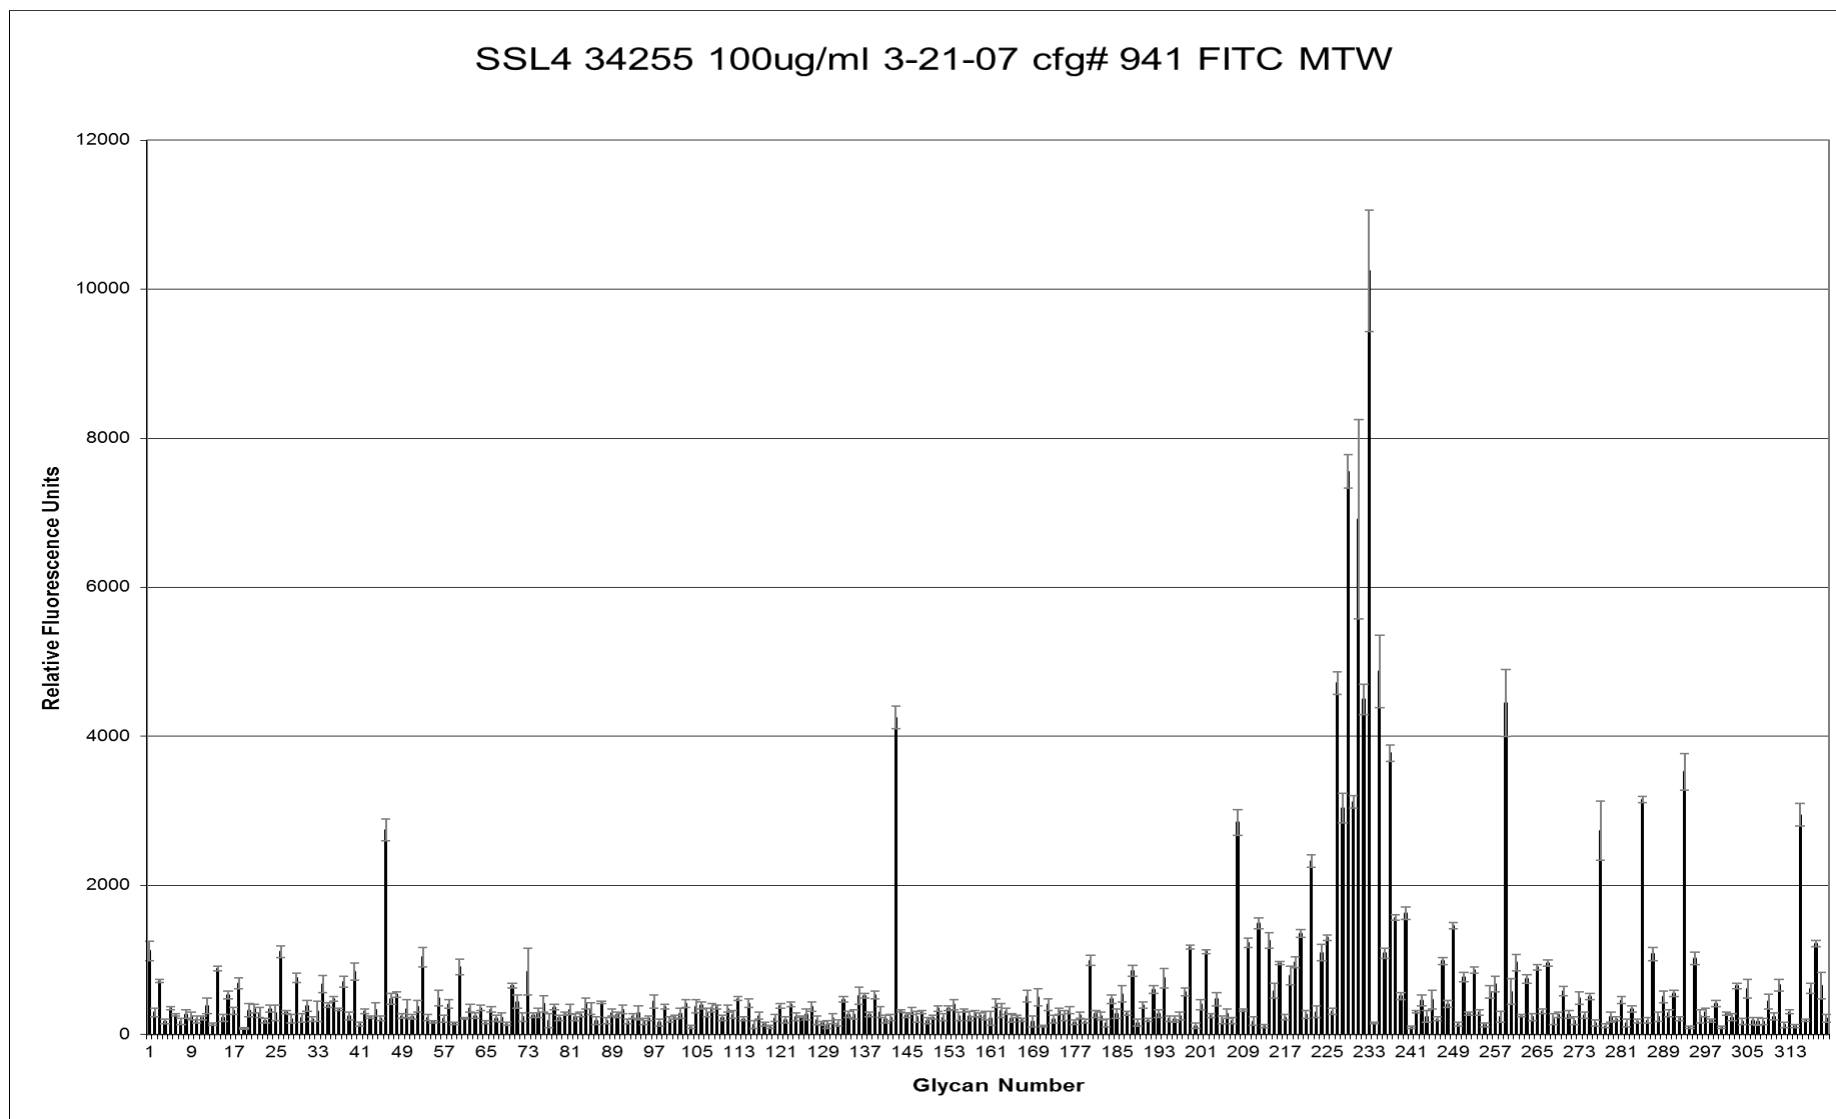

**FIGURE S2:** Graphical display of information presented in Table S1; SSL4<sub>t</sub> binding to a glycan array at 100 µg/mL
